# Supplementary material for: Composition and Antioxidant Activity of the Anthocyanins of the Fruit of Berberis heteropoda Schrenk
Source: PubMed Central journal article supplement (PMC6271762; doi:10.3390/molecules191119078), 2014-11-19
Supplement: molecules-19-19078-s001.pdf [file molecules-19-19078-s001.pdf]

# Supplementary Materials

## NMR Data

Figure S1.  $^1\text{H-NMR}$  Spectrum (500 MHz,  $\text{CD}_3\text{OD}$ ) of Compound 1.

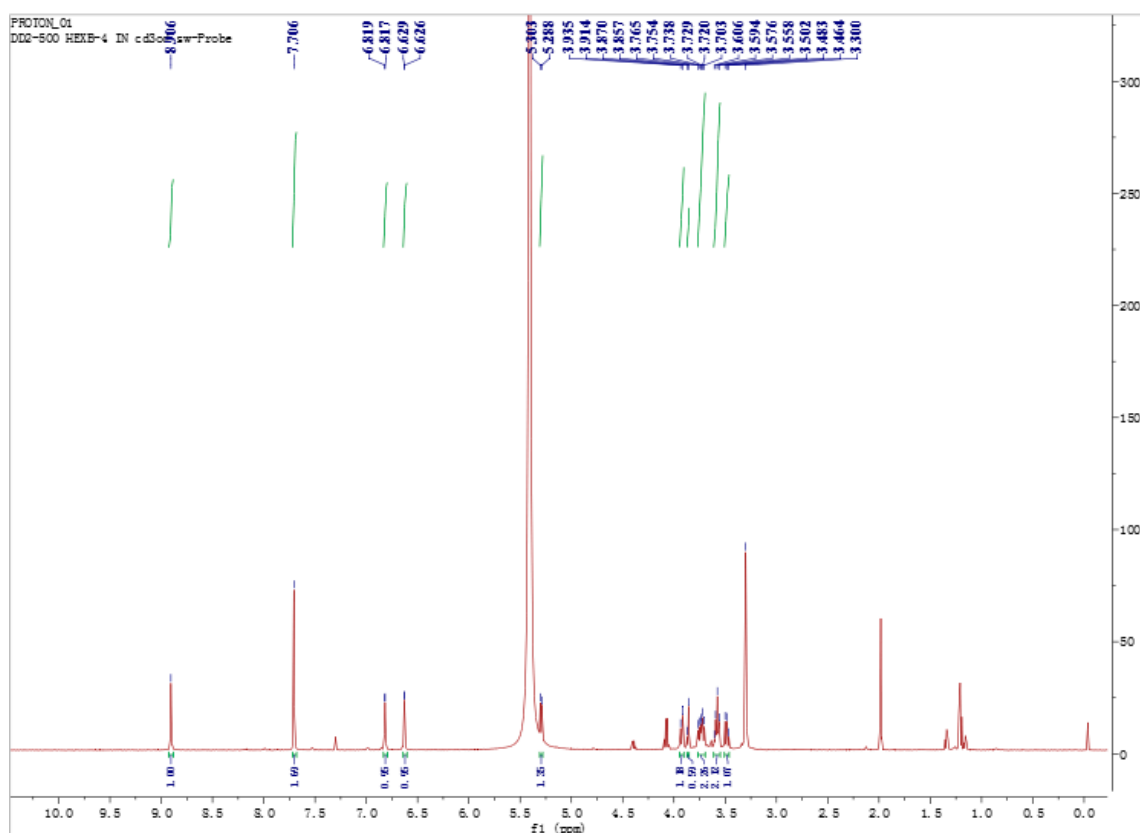

Figure S2.  $^{13}\text{C-NMR}$  Spectrum (500 MHz,  $\text{CD}_3\text{OD}$ ) of Compound 1.

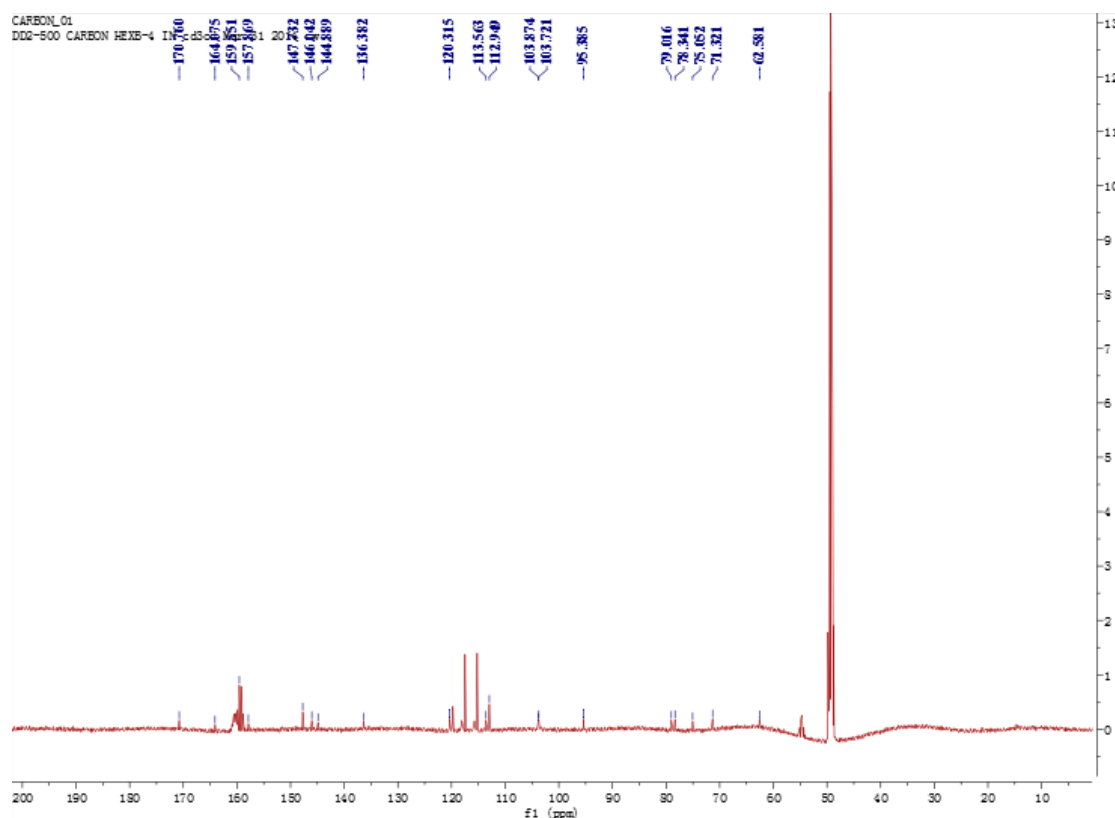

Figure S3.  $^1\text{H-NMR}$  Spectrum (500 MHz,  $\text{CD}_3\text{OD}$ ) of Compound 2.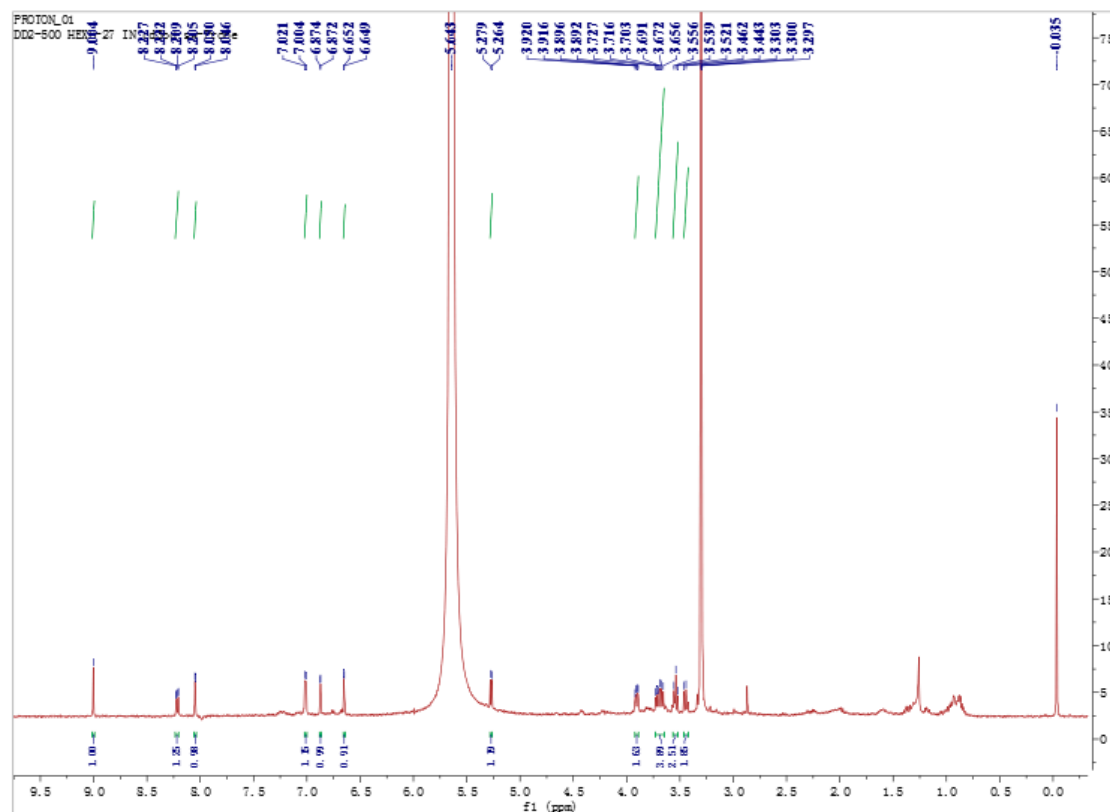Figure S4.  $^{13}\text{C-NMR}$  Spectrum (600 MHz,  $\text{CD}_3\text{OD}$ ) of Compound 2.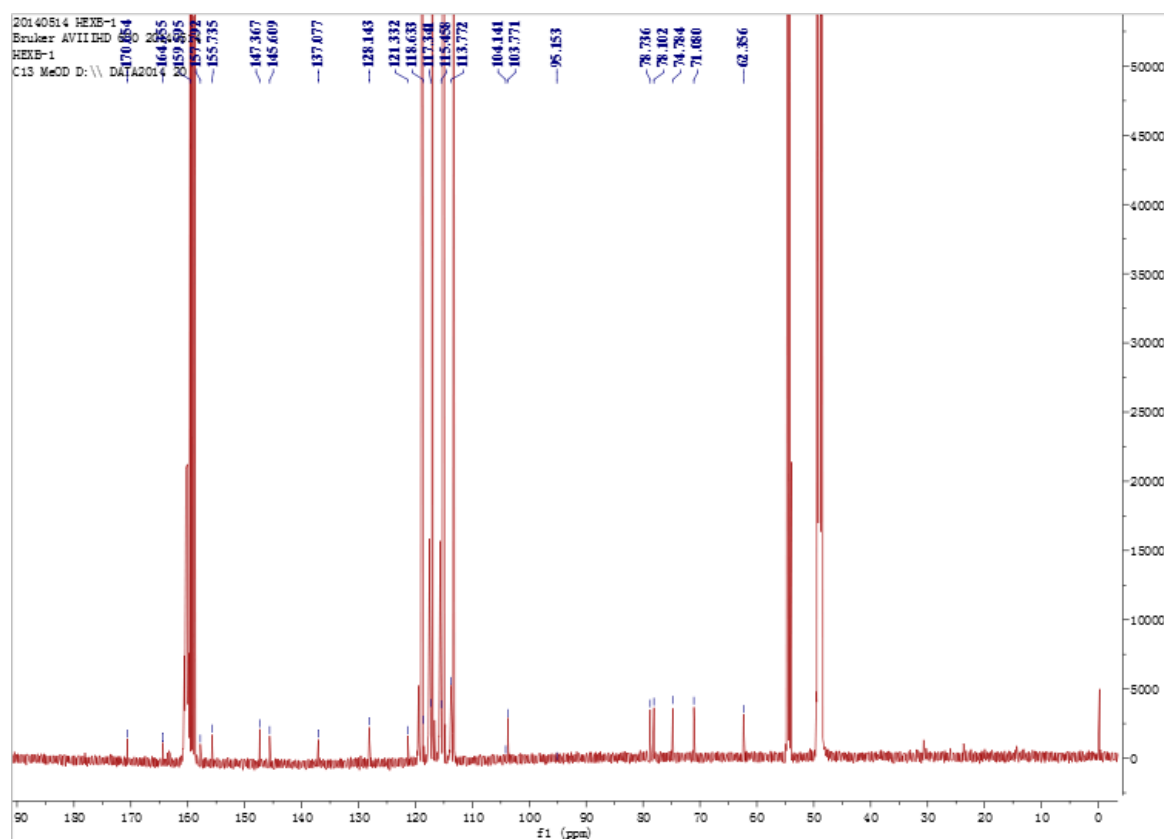

Figure S5.  $^1\text{H-NMR}$  Spectrum (600 MHz,  $\text{CD}_3\text{OD}$ ) of Compound 3.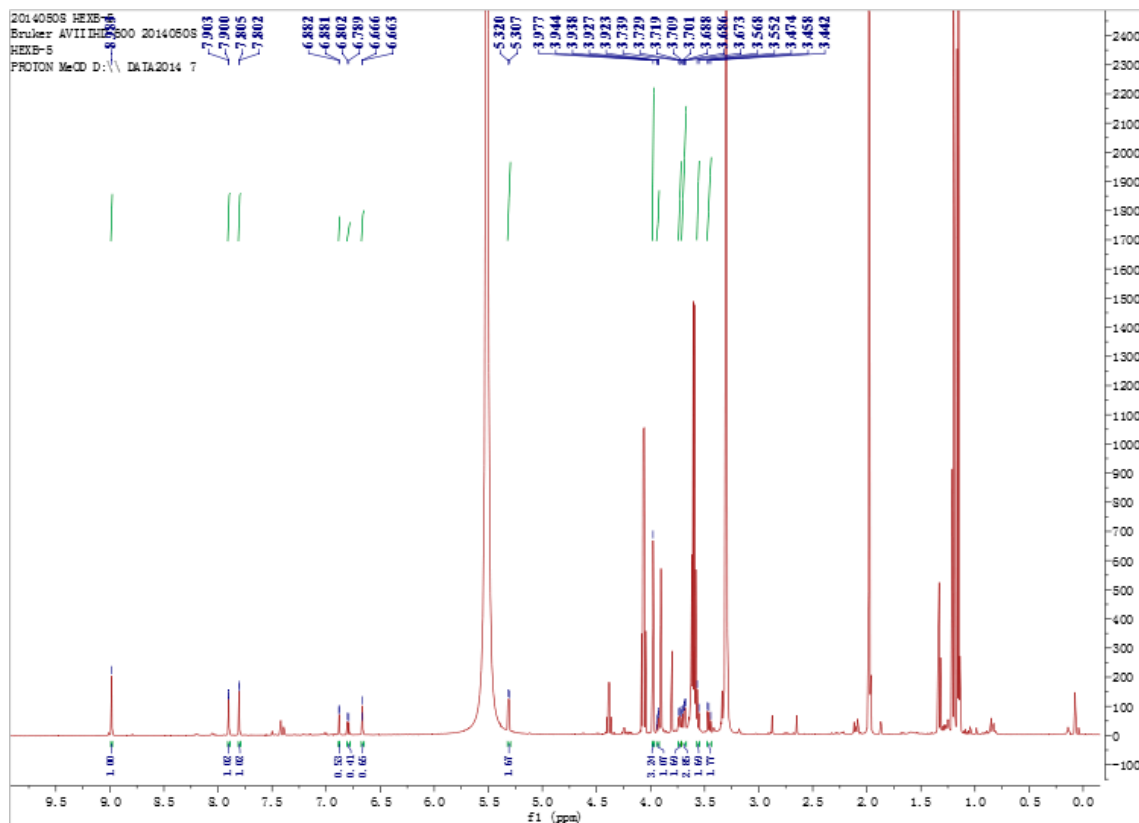Figure S6.  $^{13}\text{C-NMR}$  Spectrum (600 MHz,  $\text{CD}_3\text{OD}$ ) of Compound 3.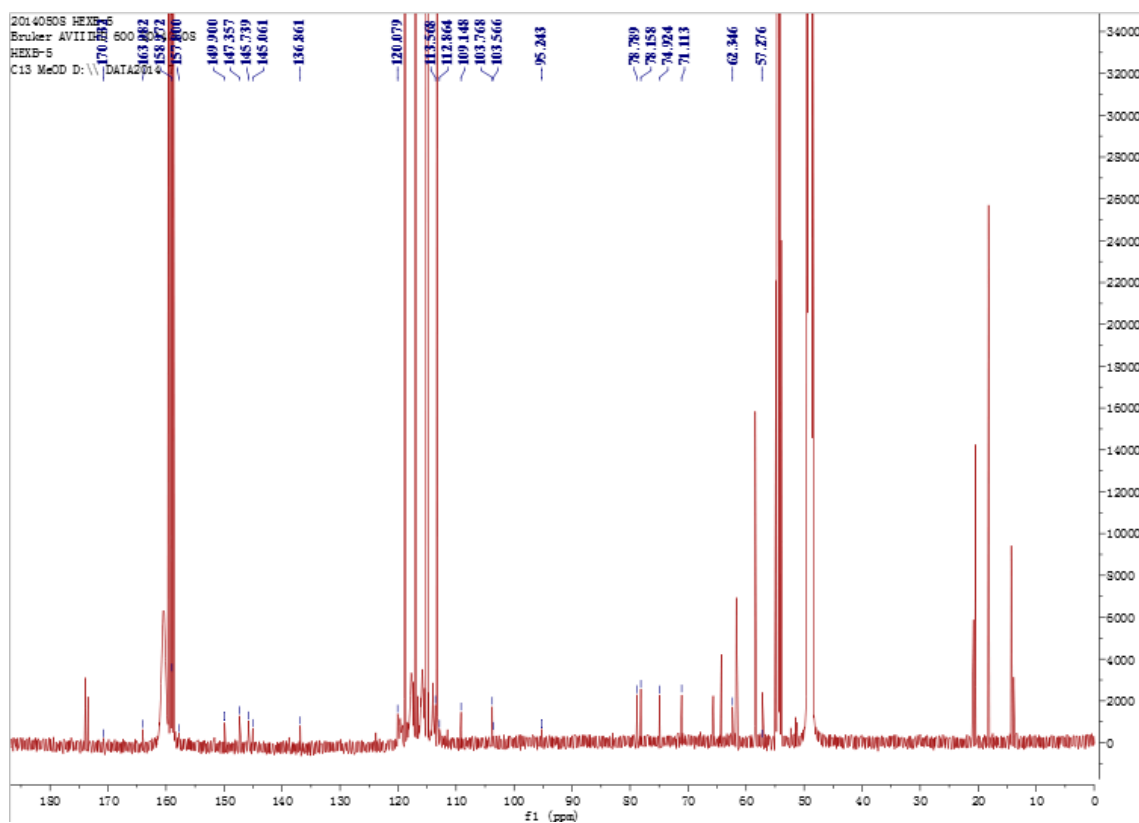

Figure S7.  $^1\text{H-NMR}$  Spectrum (500 MHz,  $\text{CD}_3\text{OD}$ ) of Compound 4.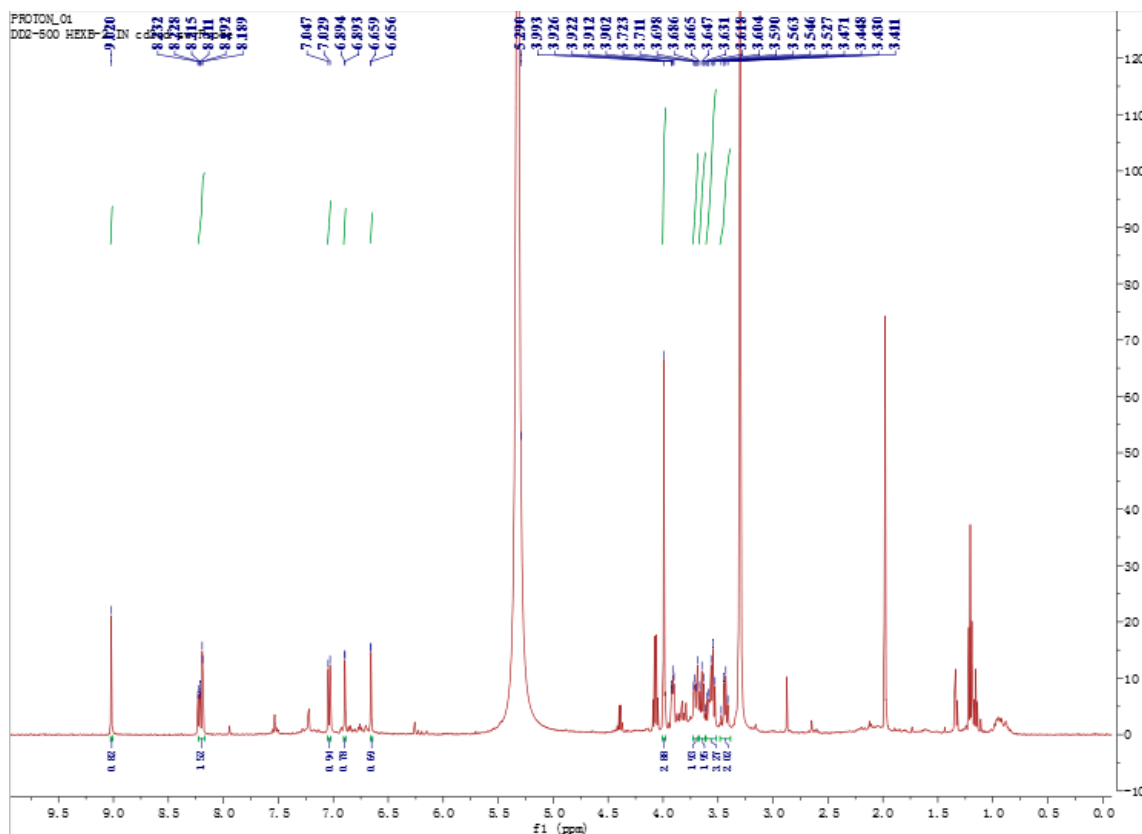Figure S8.  $^{13}\text{C-NMR}$  Spectrum (500 MHz,  $\text{CD}_3\text{OD}$ ) of Compound 4.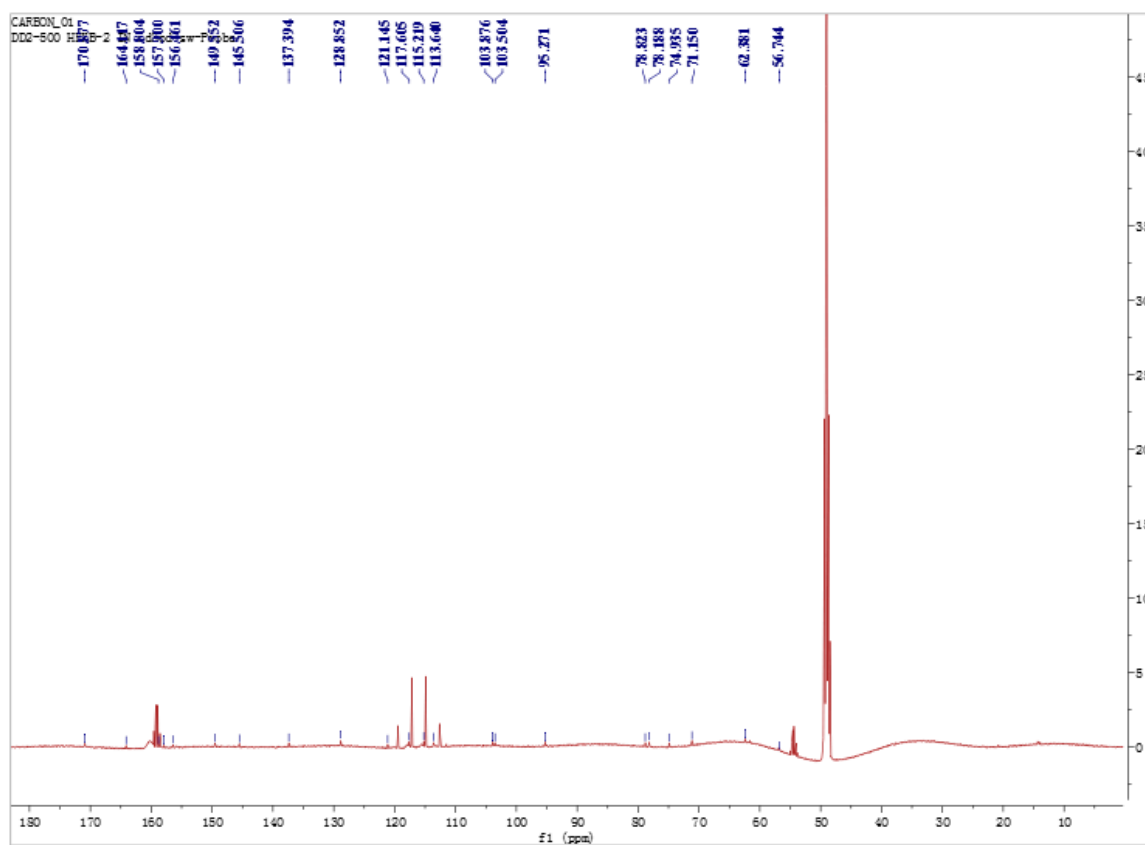

Figure S9.  $^1\text{H-NMR}$  Spectrum (500 MHz,  $\text{CD}_3\text{OD}$ ) of Compound 5.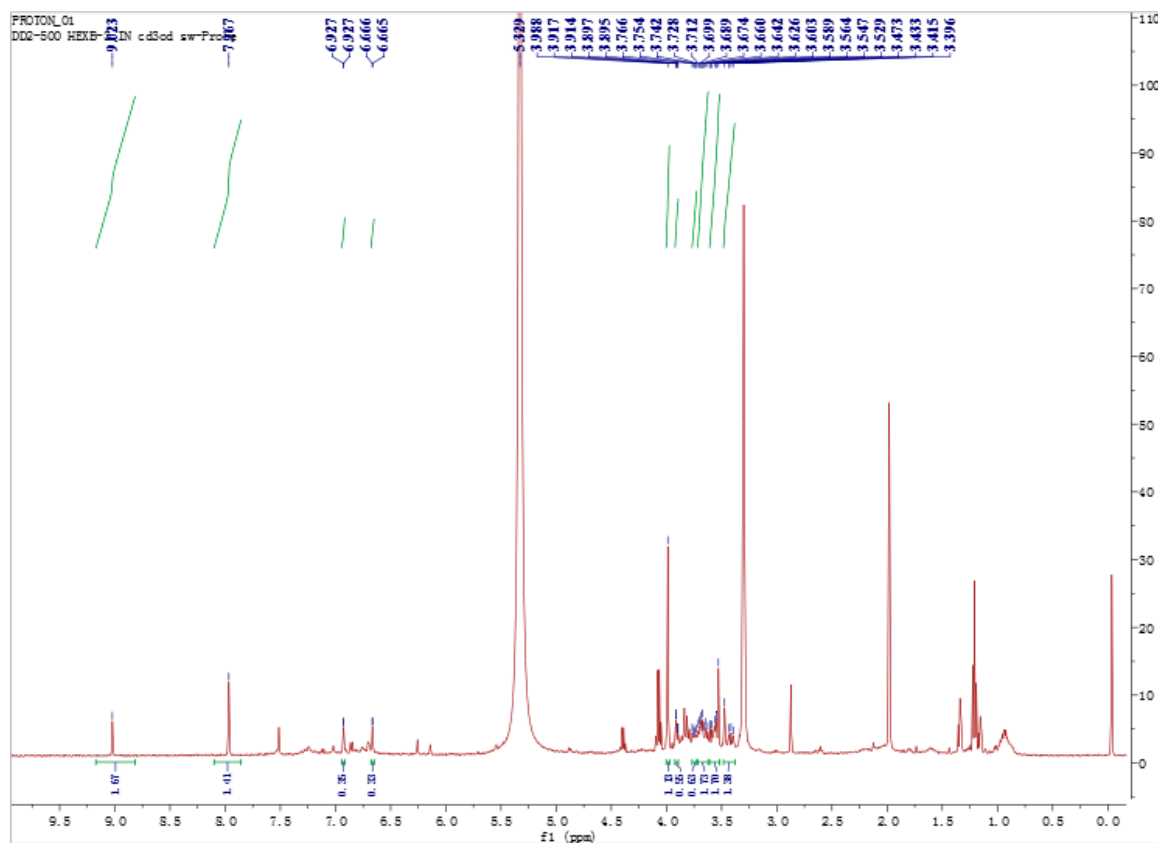Figure S10.  $^{13}\text{C-NMR}$  Spectrum (600 MHz,  $\text{CD}_3\text{OD}$ ) of Compound 5.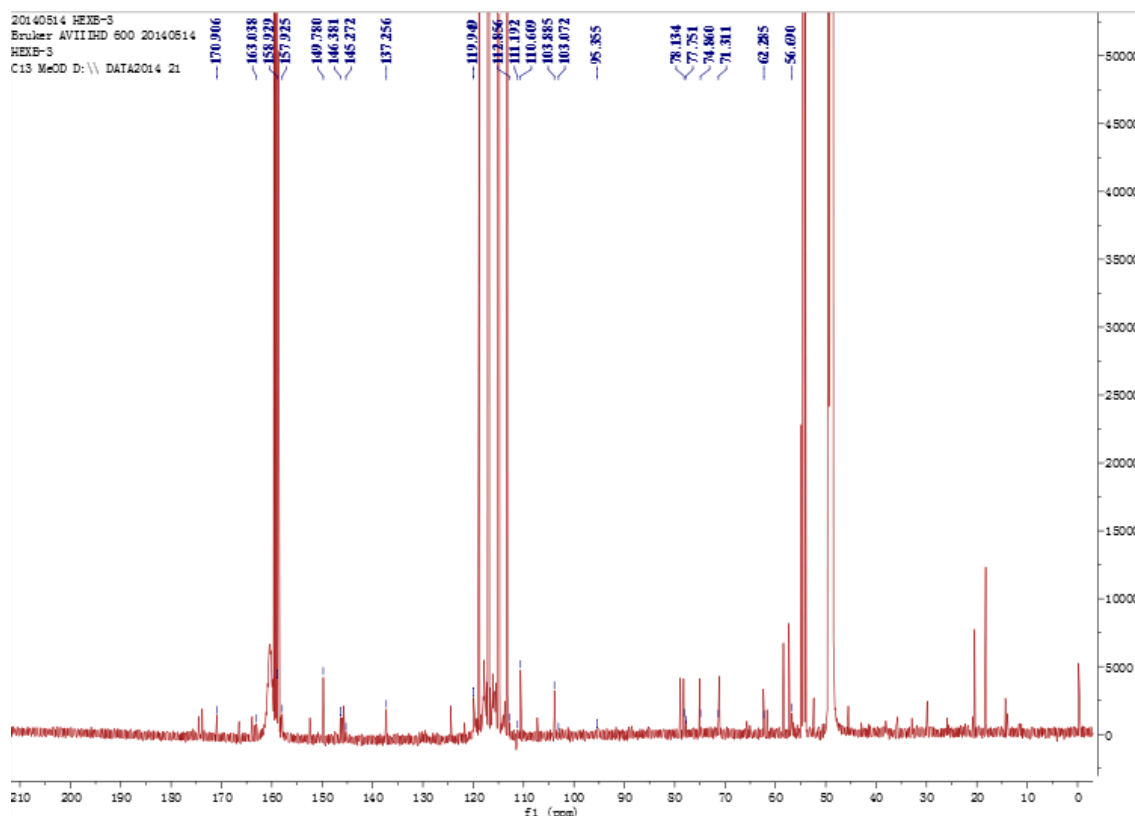

# Qualitative Analysis Report

|                 |              |                        |            |
|-----------------|--------------|------------------------|------------|
| Data Filename   | 2014031203.d | Sample Name            | HEXB-M-R-2 |
| Sample Type     | Sample       | Position               | P1-C1      |
| Instrument Name | Instrument 1 | User Name              |            |
| Acq Method      |              | IRM Calibration Status | Success    |
| DA Method       | TEST LCMS.m  | Comment                |            |

User Chromatograms

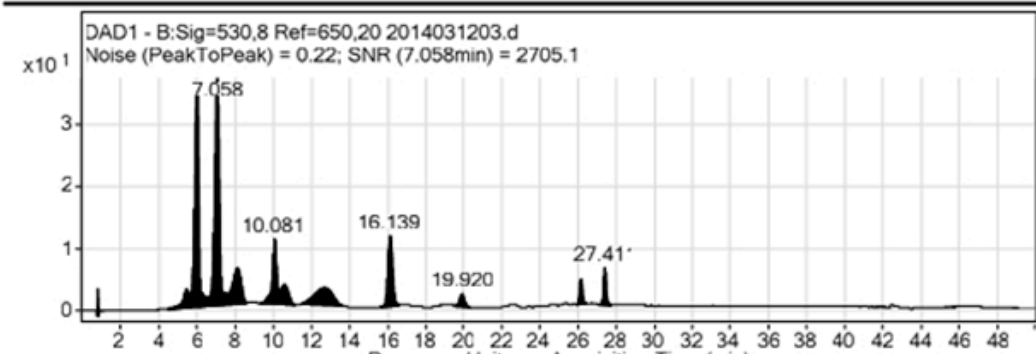

Integration Peak List

| Peak | Start  | RT     | End    | Height | Area   | Area % | Signal To Noise |
|------|--------|--------|--------|--------|--------|--------|-----------------|
| 1    | 0.764  | 0.785  | 0.851  | 4.35   | 11.58  | 1.93   | 52.2            |
| 2    | 4.47   | 5.441  | 5.636  | 3.03   | 69.85  | 11.65  | 315             |
| 3    | 5.636  | 5.995  | 6.238  | 35.11  | 508.05 | 84.7   | 2291.3          |
| 6    | 6.588  | 7.058  | 7.365  | 36.65  | 599.8  | 100    | 2705.1          |
| 8    | 7.631  | 8.122  | 8.599  | 5.77   | 182.66 | 30.45  | 823.8           |
| 9    | 9.375  | 10.081 | 10.301 | 10.44  | 164.27 | 27.39  | 740.9           |
| 10   | 10.315 | 10.586 | 11.166 | 3.18   | 91.57  | 15.27  | 413             |
| 12   | 15.64  | 16.139 | 16.59  | 11.28  | 188.41 | 31.41  | 849.7           |
| 14   | 25.915 | 26.159 | 26.442 | 4.05   | 39.07  | 6.51   | 176.2           |
| 15   | 27.108 | 27.411 | 27.728 | 6.05   | 55.84  | 9.31   | 251.8           |

Noise Measurements

| Noise Type   | Signal Definition | Noise Multiplier | Noise Value |
|--------------|-------------------|------------------|-------------|
| Peak-to-Peak | Area              | 1                | 0.221729279 |

Noise Regions

| Start | End  |
|-------|------|
| 2     | 2.5  |
| 17    | 17.3 |
| 21    | 21.5 |
| 35    | 36   |

Fragmentor Voltage: 155    Collision Energy: 0    Ionization Mode: ESI

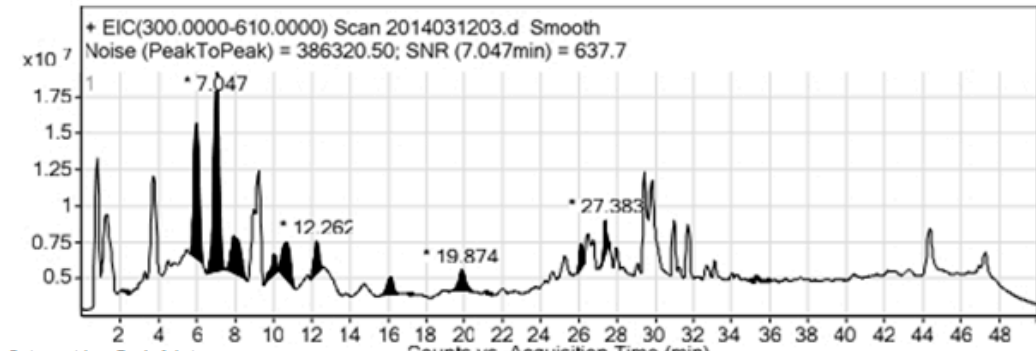

Integration Peak List

| Peak | Start | RT | End | Height | Area | Area % | Signal To Noise |
|------|-------|----|-----|--------|------|--------|-----------------|
| 1    |       |    |     |        |      |        |                 |
| 2    |       |    |     |        |      |        |                 |
| 3    |       |    |     |        |      |        |                 |
| 4    |       |    |     |        |      |        |                 |
| 5    |       |    |     |        |      |        |                 |
| 6    |       |    |     |        |      |        |                 |
| 7    |       |    |     |        |      |        |                 |
| 8    |       |    |     |        |      |        |                 |
| 9    |       |    |     |        |      |        |                 |
| 10   |       |    |     |        |      |        |                 |
| 11   |       |    |     |        |      |        |                 |
| 12   |       |    |     |        |      |        |                 |
| 13   |       |    |     |        |      |        |                 |
| 14   |       |    |     |        |      |        |                 |
| 15   |       |    |     |        |      |        |                 |
| 16   |       |    |     |        |      |        |                 |
| 17   |       |    |     |        |      |        |                 |
| 18   |       |    |     |        |      |        |                 |
| 19   |       |    |     |        |      |        |                 |
| 20   |       |    |     |        |      |        |                 |
| 21   |       |    |     |        |      |        |                 |
| 22   |       |    |     |        |      |        |                 |
| 23   |       |    |     |        |      |        |                 |
| 24   |       |    |     |        |      |        |                 |
| 25   |       |    |     |        |      |        |                 |
| 26   |       |    |     |        |      |        |                 |
| 27   |       |    |     |        |      |        |                 |
| 28   |       |    |     |        |      |        |                 |
| 29   |       |    |     |        |      |        |                 |
| 30   |       |    |     |        |      |        |                 |
| 31   |       |    |     |        |      |        |                 |
| 32   |       |    |     |        |      |        |                 |
| 33   |       |    |     |        |      |        |                 |
| 34   |       |    |     |        |      |        |                 |
| 35   |       |    |     |        |      |        |                 |
| 36   |       |    |     |        |      |        |                 |
| 37   |       |    |     |        |      |        |                 |
| 38   |       |    |     |        |      |        |                 |
| 39   |       |    |     |        |      |        |                 |
| 40   |       |    |     |        |      |        |                 |
| 41   |       |    |     |        |      |        |                 |
| 42   |       |    |     |        |      |        |                 |
| 43   |       |    |     |        |      |        |                 |
| 44   |       |    |     |        |      |        |                 |
| 45   |       |    |     |        |      |        |                 |
| 46   |       |    |     |        |      |        |                 |
| 47   |       |    |     |        |      |        |                 |
| 48   |       |    |     |        |      |        |                 |

Qualitative Analysis Report

|    |        |        |        |          |           |       |       |
|----|--------|--------|--------|----------|-----------|-------|-------|
| 1  | 5.643  | 5.958  | 6.291  | 9305231  | 138761428 | 56.33 | 359.2 |
| 2  | 6.538  | 7.047  | 7.42   | 13649907 | 246355155 | 100   | 637.7 |
| 3  | 7.572  | 7.947  | 8.533  | 2550884  | 82236530  | 33.38 | 212.9 |
| 4  | 9.485  | 10.019 | 10.274 | 1388628  | 25939712  | 10.53 | 67.1  |
| 5  | 10.274 | 10.701 | 11.103 | 2522141  | 58645466  | 23.81 | 151.8 |
| 6  | 11.935 | 12.262 | 12.58  | 2184565  | 33458516  | 13.58 | 86.6  |
| 7  | 15.726 | 16.136 | 16.494 | 1195086  | 23994944  | 9.74  | 62.1  |
| 8  | 19.358 | 19.874 | 20.391 | 1440409  | 32571062  | 13.22 | 84.3  |
| 9  | 25.946 | 26.122 | 26.305 | 1671097  | 16852523  | 6.84  | 43.6  |
| 10 | 27.139 | 27.383 | 27.565 | 2216671  | 29388656  | 11.93 | 76.1  |

Noise Measurements

| Noise Type   | Signal Definition | Noise Multiplier | Noise Value |
|--------------|-------------------|------------------|-------------|
| Peak-to-Peak | Area              | 1                | 386320.5    |

Noise Regions

| Start | End  |
|-------|------|
| 2     | 2.5  |
| 17    | 17.3 |
| 21    | 21.5 |
| 35    | 36   |

User Spectra

Frequency Voltage 155 Collision Energy 0 Ionization Mode ESI

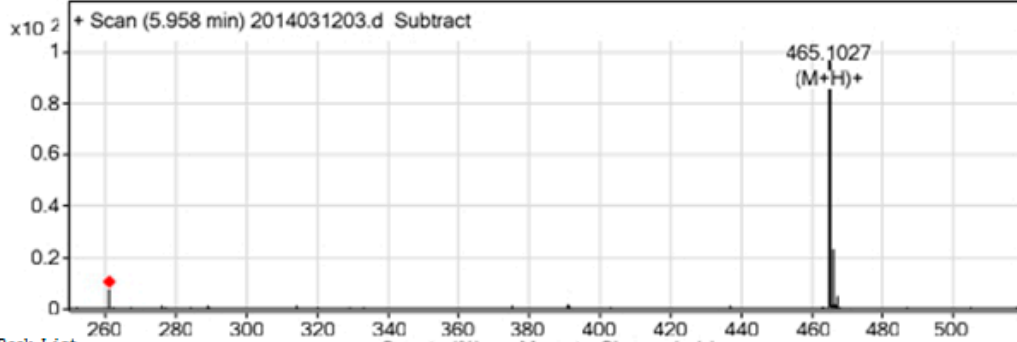

| Peak List m/z | z | Abund   | Formula     | Ion    |
|---------------|---|---------|-------------|--------|
| 103.0391      |   | 69327   |             |        |
| 117.0547      |   | 68615   |             |        |
| 177.0753      |   | 176012  |             |        |
| 199.0574      |   | 446619  |             |        |
| 261.0273      |   | 96862   |             |        |
| 465.1027      | 1 | 1247393 | C21 H21 O12 | (M+H)+ |
| 465.283       |   | 76112   |             |        |
| 466.1066      | 1 | 294210  | C21 H21 O12 | (M+H)+ |
| 467.1087      | 1 | 63460   | C21 H21 O12 | (M+H)+ |

Formula Calculator Element Limits

| Element | Min | Max |
|---------|-----|-----|
| C       | 3   | 100 |
| H       | 0   | 500 |
| O       | 0   | 90  |
| N       | 0   | 5   |
| S       | 0   | 0   |
| Cl      | 0   | 0   |
| Br      | 0   | 0   |
| Si      | 0   | 0   |
| F       | 0   | 0   |
| Element | Min | Max |

Qualitative Analysis Report

|   |   |   |
|---|---|---|
| P | 0 | 0 |
|---|---|---|

Formula Calculator Results

| Formula          | Best | Mass     | Tgt Mass | Diff (ppm) | Ion Species      | Score |
|------------------|------|----------|----------|------------|------------------|-------|
| C21 H20 O12      | TRUE | 464.0955 | 464.0955 | 0.01       | C21 H21 O12      | 99.99 |
| C19 H18 N3 O11   |      | 464.0955 | 464.0941 | -2.89      | C19 H19 N3 O11   | 99.8  |
| C22 H16 N4 O8    |      | 464.0955 | 464.0968 | 2.88       | C22 H17 N4 O8    | 99.7  |
| C24 H18 N O9     |      | 464.0955 | 464.0982 | 5.78       | C24 H19 N O9     | 99.17 |
| C25 H20 O7 S     |      | 464.0955 | 464.093  | -5.39      | C25 H21 O7 S     | 98.48 |
| C16 H22 N3 O11 S |      | 464.0955 | 464.0975 | 4.37       | C16 H23 N3 O11 S | 98.43 |
| C26 H16 N4 O3 S  |      | 464.0955 | 464.0943 | -2.51      | C26 H17 N4 O3 S  | 98.43 |
| C28 H18 N O4 S   |      | 464.0955 | 464.0957 | 0.39       | C28 H19 N O4 S   | 98.18 |
| C20 H22 N3 O6 S2 |      | 464.0955 | 464.095  | -1.03      | C20 H23 N3 O6 S2 | 97.64 |
| C22 H24 O7 S2    |      | 464.0955 | 464.0963 | 1.87       | C22 H25 O7 S2    | 97.49 |

Fragmentor Voltage: 155  
 Collision Energy: 30  
 Ionization Mode: ESI

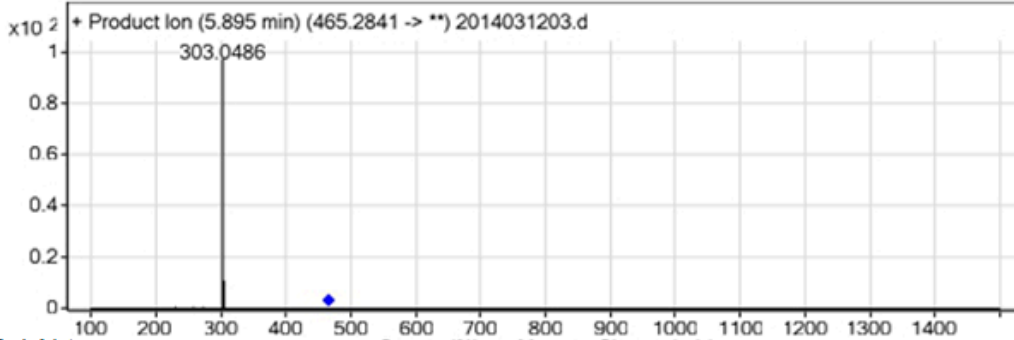

Peak List

| m/z      | z | Abund  |
|----------|---|--------|
| 303.0486 | 1 | 178656 |
| 304.0508 | 1 | 18712  |

Formula Calculator Element Limits

| Element | Min | Max |
|---------|-----|-----|
| C       | 3   | 100 |
| H       | 0   | 500 |
| O       | 0   | 90  |
| N       | 0   | 5   |
| S       | 0   | 0   |
| Cl      | 0   | 0   |
| Br      | 0   | 0   |
| Si      | 0   | 0   |
| F       | 0   | 0   |
| P       | 0   | 0   |

Fragmentor Voltage: 155  
 Collision Energy: 0  
 Ionization Mode: ESI

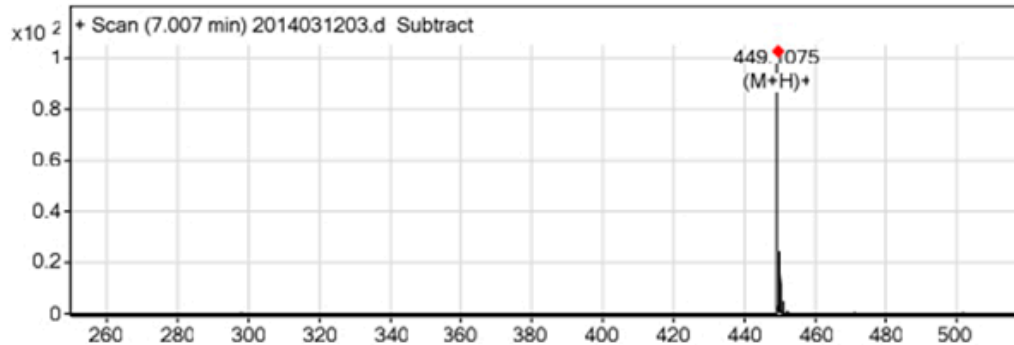



Qualitative Analysis Report

Peak List

| m/z      | z | Abund   | Formula     | Ion    |
|----------|---|---------|-------------|--------|
| 449.1075 | 1 | 1648556 | C21 H21 O11 | (M+H)+ |
| 449.2871 |   | 109469  |             |        |
| 450.1116 | 1 | 406326  | C21 H21 O11 | (M+H)+ |
| 451.1128 | 1 | 82613   | C21 H21 O11 | (M+H)+ |

Formula Calculator Element Limits

| Element | Min | Max |
|---------|-----|-----|
| C       | 3   | 100 |
| H       | 0   | 500 |
| O       | 0   | 90  |
| N       | 0   | 5   |
| S       | 0   | 0   |
| Cl      | 0   | 0   |
| Br      | 0   | 0   |
| Si      | 0   | 0   |
| F       | 0   | 0   |
| P       | 0   | 0   |

Formula Calculator Results

| Formula          | Best | Mass     | Igt. Mass | Diff (ppm) | Ion Species      | Score |
|------------------|------|----------|-----------|------------|------------------|-------|
| C21 H20 O11      | TRUE | 448.1003 | 448.1006  | 0.63       | C21 H21 O11      | 99.94 |
| C19 H18 N3 O10   |      | 448.1003 | 448.0992  | -2.38      | C19 H19 N3 O10   | 99.73 |
| C22 H16 N4 O7    |      | 448.1003 | 448.1019  | 3.6        | C22 H17 N4 O7    | 99.71 |
| C26 H16 N4 O2 S  |      | 448.1003 | 448.0994  | -1.98      | C26 H17 N4 O2 S  | 98.76 |
| C25 H20 O6 S     |      | 448.1003 | 448.0981  | -4.96      | C25 H21 O6 S     | 98.74 |
| C28 H18 N O3 S   |      | 448.1003 | 448.1007  | 1.02       | C28 H19 N O3 S   | 98.5  |
| C16 H22 N3 O10 S |      | 448.1003 | 448.1026  | 5.14       | C16 H23 N3 O10 S | 98.04 |
| C20 H22 N3 O5 S2 |      | 448.1003 | 448.1001  | -0.45      | C20 H23 N3 O5 S2 | 97.62 |
| C22 H24 O6 S2    |      | 448.1003 | 448.1014  | 2.56       | C22 H25 O6 S2    | 97.46 |
| C23 H20 N4 O2 S2 |      | 448.1003 | 448.1028  | 5.53       | C23 H21 N4 O2 S2 | 97.25 |

Fragmentor Voltage: 155  
 Collision Energy: 30  
 Ionization Mode: ESI

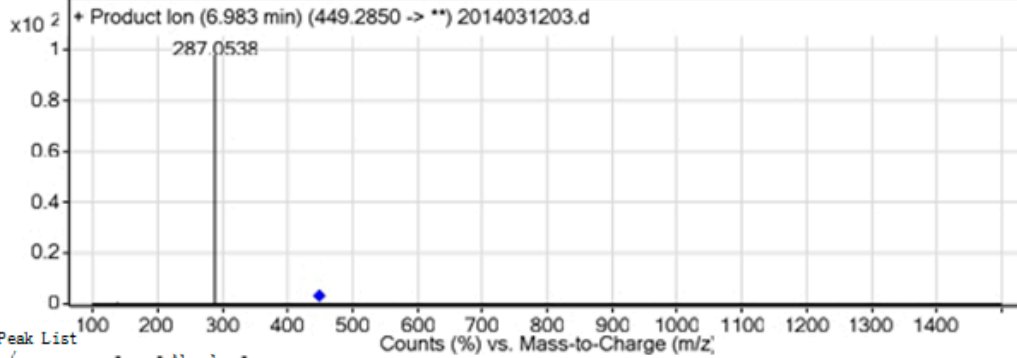

Peak List

| m/z      | z | Abund  |
|----------|---|--------|
| 287.0538 | 1 | 267384 |
| 287.1966 |   | 13466  |
| 288.0569 | 1 | 29125  |

Formula Calculator Element Limits

| Element | Min | Max |
|---------|-----|-----|
| C       | 3   | 100 |
| H       | 0   | 500 |
| O       | 0   | 90  |
| N       | 0   | 5   |
| S       | 0   | 0   |
| Cl      | 0   | 0   |
| Br      | 0   | 0   |

## Qualitative Analysis Report

| Element | Min | Max |
|---------|-----|-----|
| Si      | 0   | 0   |
| F       | 0   | 0   |
| P       | 0   | 0   |

Fragmentor Voltage 155 Collision Energy 0 Ionization Mode Esi

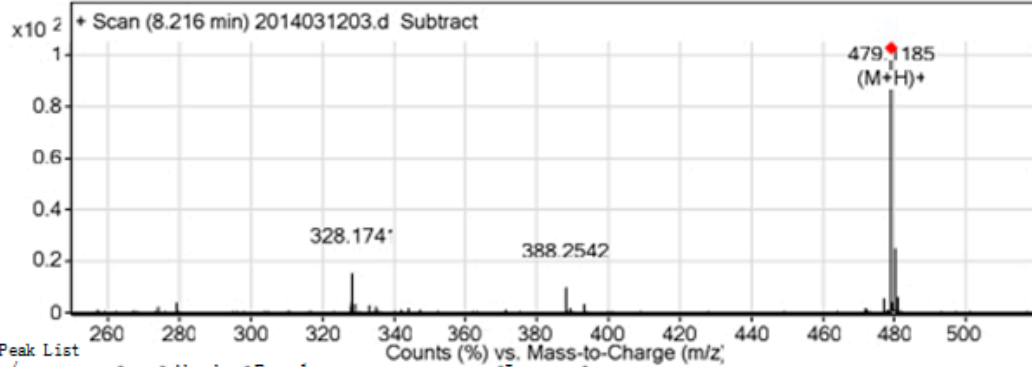

| Peak List | m/z      | z | Abund  | Formula     | Ion    |
|-----------|----------|---|--------|-------------|--------|
|           | 328.1741 |   | 34593  |             |        |
|           | 388.2542 |   | 22923  |             |        |
|           | 477.1187 |   | 13271  |             |        |
|           | 479.1185 | 1 | 230115 | C22 H23 O12 | (M+H)+ |
|           | 480.1215 | 1 | 57123  | C22 H23 O12 | (M+H)+ |
|           | 481.1229 | 1 | 13627  | C22 H23 O12 | (M+H)+ |

Formula Calculator Element Limits

| Element | Min | Max |
|---------|-----|-----|
| C       | 3   | 100 |
| H       | 0   | 500 |
| O       | 0   | 90  |
| N       | 0   | 5   |
| S       | 0   | 0   |
| Cl      | 0   | 0   |
| Br      | 0   | 0   |
| Si      | 0   | 0   |
| F       | 0   | 0   |
| P       | 0   | 0   |

Formula Calculator Results

| Formula          | Best | Mass     | Tgt Mass | Diff (ppm) | Ion Species      | Score |
|------------------|------|----------|----------|------------|------------------|-------|
| C22 H22 O12      | TRUE | 478.1113 | 478.1111 | -0.27      | C22 H23 O12      | 99.97 |
| C20 H20 N3 O11   |      | 478.1113 | 478.1098 | -3.08      | C20 H21 N3 O11   | 99.77 |
| C23 H18 N4 O8    |      | 478.1113 | 478.1125 | 2.52       | C23 H19 N4 O8    | 99.73 |
| C25 H20 N O9     |      | 478.1113 | 478.1138 | 5.34       | C25 H21 N O9     | 99.25 |
| C17 H24 N3 O11 S |      | 478.1113 | 478.1132 | 3.96       | C17 H25 N3 O11 S | 98.71 |
| C26 H22 O7 S     |      | 478.1113 | 478.1086 | -5.51      | C26 H23 O7 S     | 98.69 |
| C27 H18 N4 O3 S  |      | 478.1113 | 478.11   | -2.72      | C27 H19 N4 O3 S  | 98.66 |
| C29 H20 N O4 S   |      | 478.1113 | 478.1113 | 0.1        | C29 H21 N O4 S   | 98.45 |
| C21 H24 N3 O6 S2 |      | 478.1113 | 478.1107 | -1.28      | C21 H25 N3 O6 S2 | 98.02 |
| C23 H26 O7 S2    |      | 478.1113 | 478.112  | 1.54       | C23 H27 O7 S2    | 97.88 |

Fragmentor Voltage 155 Collision Energy 30 Ionization Mode Esi

Qualitative Analysis Report

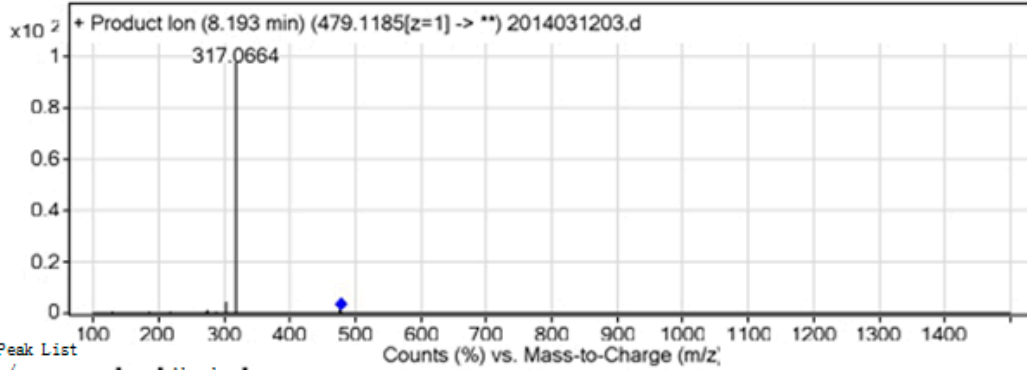

Peak List

| m/z      | z | Abund |
|----------|---|-------|
| 317.0664 | 1 | 41425 |
| 318.0695 | 1 | 4558  |

Formula Calculator Element Limits

| Element | Min | Max |
|---------|-----|-----|
| C       | 3   | 100 |
| H       | 0   | 500 |
| O       | 0   | 90  |
| N       | 0   | 5   |
| S       | 0   | 0   |
| Cl      | 0   | 0   |
| Br      | 0   | 0   |
| Si      | 0   | 0   |
| F       | 0   | 0   |
| P       | 0   | 0   |

Prepenter Voltage 155      Collision Energy 0      Ionization Mode ESI

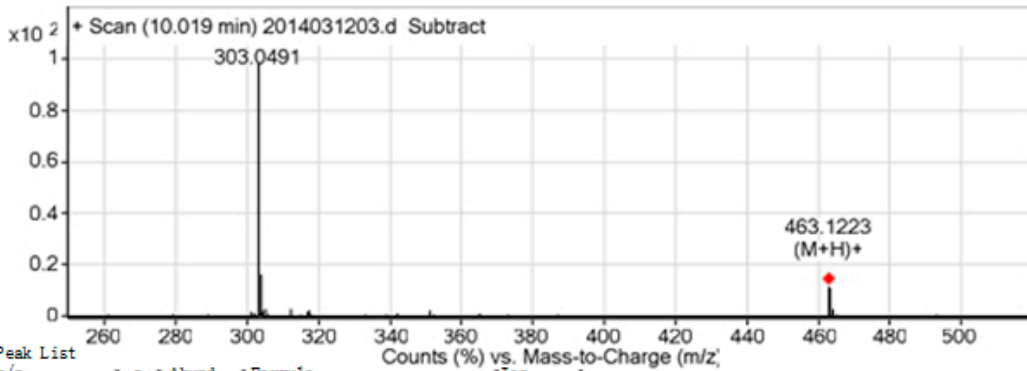

Peak List

| m/z      | z | Abund  | Formula     | Ion    |
|----------|---|--------|-------------|--------|
| 185.0426 |   | 20088  |             |        |
| 303.0491 | 1 | 267569 |             |        |
| 304.0526 | 1 | 45089  |             |        |
| 463.1223 |   | 30856  | C22 H23 O11 | (M+H)+ |
| 565.1183 |   | 27505  |             |        |

Formula Calculator Element Limits

| Element | Min | Max |
|---------|-----|-----|
| C       | 3   | 100 |
| H       | 0   | 500 |
| O       | 0   | 90  |
| N       | 0   | 5   |
| S       | 0   | 0   |
| Cl      | 0   | 0   |
| Br      | 0   | 0   |

Qualitative Analysis Report

| Element | Min | Max |
|---------|-----|-----|
| Si      | 0   | 0   |
| F       | 0   | 0   |
| P       | 0   | 0   |

Formula Calculator Results

| Formula        | Best | Mass    | Tgt Mass | Diff (ppm) | Ion Species    | Score |
|----------------|------|---------|----------|------------|----------------|-------|
| C20 H20 N3 O10 |      | 462.115 | 462.1149 | -0.25      | C20 H21 N3 O10 | 99.86 |
| C22 H22 O11    | TRUE | 462.115 | 462.1162 | 2.67       | C22 H23 O11    | 99.64 |
| C23 H18 N4 O7  |      | 462.115 | 462.1175 | 5.55       | C23 H19 N4 O7  | 98.85 |
| C32 H16 N O3   |      | 462.115 | 462.113  | -4.25      | C32 H17 N O3   | 96.04 |
| C35 H14 N2     |      | 462.115 | 462.1157 | 1.55       | C35 H15 N2     | 94.63 |

Frequency Voltage 155 Collision Energy 30 Ionization Mode ESI

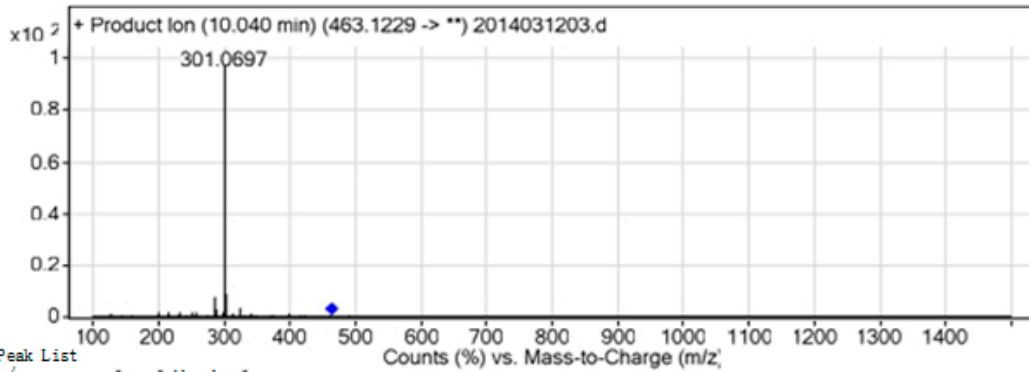

Peak List

| m/z      | z | Abund |
|----------|---|-------|
| 286.0464 |   | 401   |
| 301.0697 | 1 | 5153  |
| 302.0763 | 1 | 448   |

Formula Calculator Element Limits

| Element | Min | Max |
|---------|-----|-----|
| C       | 3   | 100 |
| H       | 0   | 500 |
| O       | 0   | 90  |
| N       | 0   | 5   |
| S       | 0   | 0   |
| Cl      | 0   | 0   |
| Br      | 0   | 0   |
| Si      | 0   | 0   |
| F       | 0   | 0   |
| P       | 0   | 0   |

Frequency Voltage 155 Collision Energy 0 Ionization Mode ESI

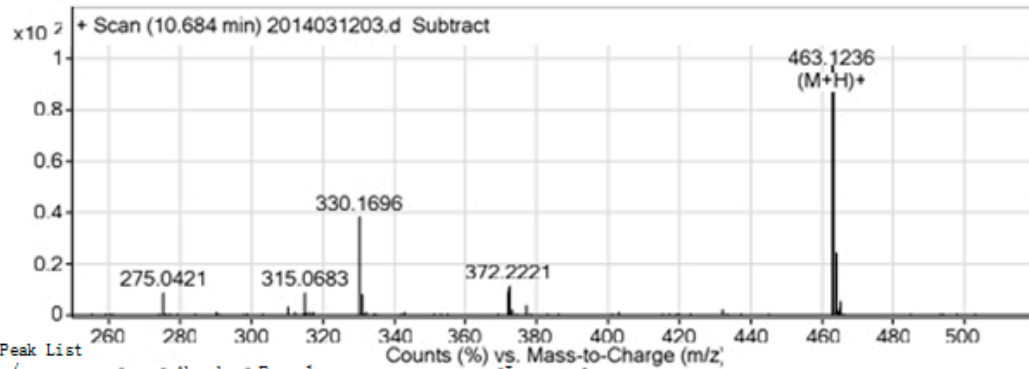

Peak List

| m/z      | z | Abund | Formula | Ion    |
|----------|---|-------|---------|--------|
| 275.0421 |   |       |         |        |
| 315.0683 |   |       |         |        |
| 330.1696 |   |       |         |        |
| 372.2221 |   |       |         |        |
| 463.1236 |   |       |         | (M+H)+ |

Qualitative Analysis Report

|          |   |        |             |        |
|----------|---|--------|-------------|--------|
| 117.0546 |   | 32605  |             |        |
| 191.0911 |   | 47238  |             |        |
| 213.0726 |   | 109922 |             |        |
| 275.0421 |   | 19304  |             |        |
| 315.0683 |   | 19582  |             |        |
| 330.1696 | 1 | 86073  |             |        |
| 331.1726 | 1 | 18597  |             |        |
| 372.2221 |   | 25795  |             |        |
| 463.1236 | 1 | 224838 | C22 H23 O11 | (M+H)+ |
| 464.1268 | 1 | 55610  | C22 H23 O11 | (M+H)+ |

Formula Calculator Element Limits

| Element | Min | Max |
|---------|-----|-----|
| C       | 3   | 100 |
| H       | 0   | 500 |
| O       | 0   | 90  |
| N       | 0   | 5   |
| S       | 0   | 0   |
| Cl      | 0   | 0   |
| Br      | 0   | 0   |
| Si      | 0   | 0   |
| F       | 0   | 0   |
| P       | 0   | 0   |

Formula Calculator Results

| Formula        | Best | Mass     | Igt Mass | Diff (ppm) | Ion Species    | Score |
|----------------|------|----------|----------|------------|----------------|-------|
| C22 H22 O11    | TRUE | 462.1163 | 462.1162 | -0.28      | C22 H23 O11    | 99.96 |
| C20 H20 N3 O10 |      | 462.1163 | 462.1149 | -3.19      | C20 H21 N3 O10 | 99.74 |
| C23 H18 N4 O7  |      | 462.1163 | 462.1175 | 2.61       | C23 H19 N4 O7  | 99.74 |
| C25 H20 N O8   |      | 462.1163 | 462.1189 | 5.52       | C25 H21 N O8   | 99.24 |
| C35 H14 N2     |      | 462.1163 | 462.1157 | -1.39      | C35 H15 N2     | 96.27 |

Examiner Voltage 155 Collision Energy 30 Ionization Mode ESI

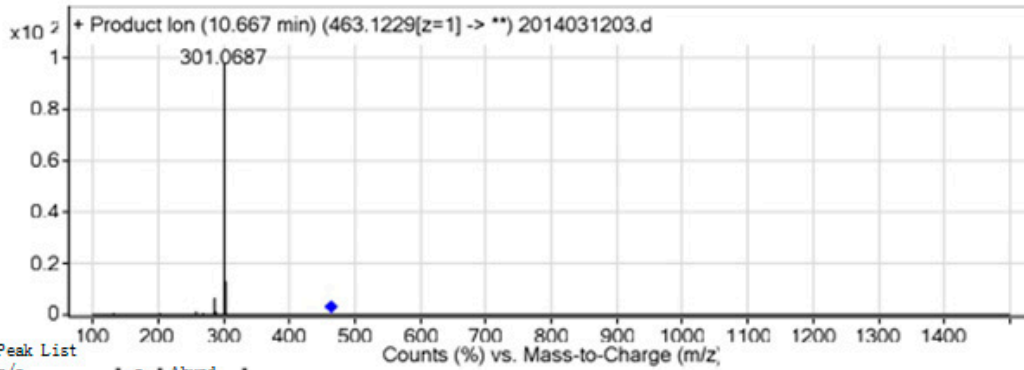

Peak List

| m/z      | z | Abund |
|----------|---|-------|
| 286.0452 |   | 2542  |
| 301.0687 | 1 | 38360 |
| 302.0737 | 1 | 4892  |

Formula Calculator Element Limits

| Element | Min | Max |
|---------|-----|-----|
| C       | 3   | 100 |
| H       | 0   | 500 |
| O       | 0   | 90  |
| N       | 0   | 5   |
| S       | 0   | 0   |
| Cl      | 0   | 0   |
| Element | Min | Max |
| Br      | 0   | 0   |

Qualitative Analysis Report

|    |   |   |
|----|---|---|
| Si | 0 | 0 |
| F  | 0 | 0 |
| P  | 0 | 0 |

Fragmentor Voltage: 155  
 Collision Energy: 0  
 Ionization Mode: ESI

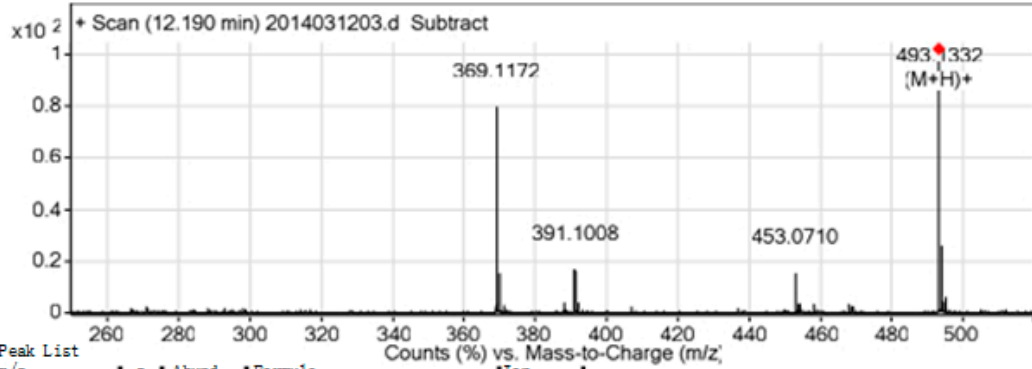

| Peak List m/z | z | Abund  | Formula     | Ion    |
|---------------|---|--------|-------------|--------|
| 163.0386      |   | 18728  |             |        |
| 204.0372      |   | 10805  |             |        |
| 224.5494      | 2 | 54125  |             |        |
| 225.0505      | 2 | 14119  |             |        |
| 369.1172      | 1 | 98097  |             |        |
| 370.1205      | 1 | 18943  |             |        |
| 391.1008      |   | 20630  |             |        |
| 453.071       |   | 18537  |             |        |
| 493.1332      | 1 | 121765 | C23 H25 O12 | (M+H)+ |
| 494.1369      | 1 | 32098  | C23 H25 O12 | (M+H)+ |

Formula Calculator Element Limits

| Element | Min | Max |
|---------|-----|-----|
| C       | 3   | 100 |
| H       | 0   | 500 |
| O       | 0   | 90  |
| N       | 0   | 5   |
| S       | 0   | 0   |
| Cl      | 0   | 0   |
| Br      | 0   | 0   |
| Si      | 0   | 0   |
| F       | 0   | 0   |
| P       | 0   | 0   |

Formula Calculator Results

| Formula        | Best | Mass    | Tgt Mass | Diff (ppm) | Ion Species    | Score |
|----------------|------|---------|----------|------------|----------------|-------|
| C23 H24 O12    | TRUE | 492.126 | 492.1268 | 1.64       | C23 H25 O12    | 99.94 |
| C21 H22 N3 O11 |      | 492.126 | 492.1254 | -1.1       | C21 H23 N3 O11 | 99.88 |
| C24 H20 N4 O8  |      | 492.126 | 492.1281 | 4.35       | C24 H21 N4 O8  | 99.59 |
| C33 H18 N O4   |      | 492.126 | 492.1236 | -4.85      | C33 H19 N O4   | 97.6  |
| C34 H14 N5     |      | 492.126 | 492.1249 | -2.14      | C34 H15 N5     | 96.96 |
| C36 H16 N2 O   |      | 492.126 | 492.1263 | 0.59       | C36 H17 N2 O   | 96.64 |

Fragmentor Voltage: 155  
 Collision Energy: 30  
 Ionization Mode: ESI

Qualitative Analysis Report

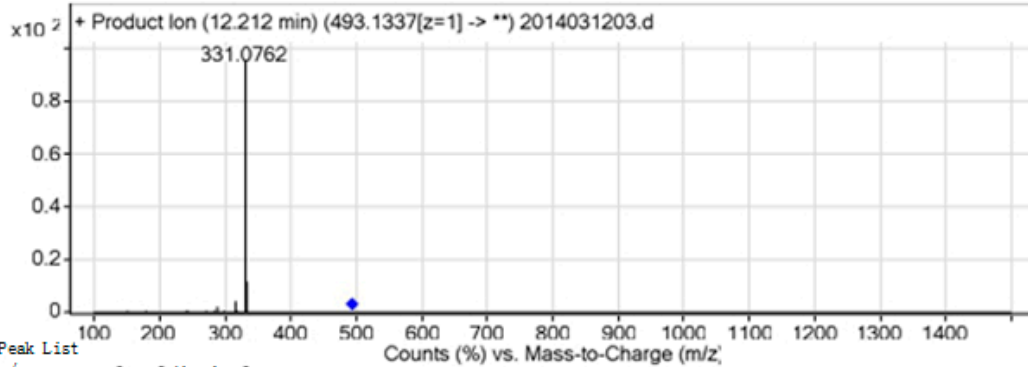

Peak List

| m/z      | z | Abund |
|----------|---|-------|
| 331.0762 | 1 | 26264 |
| 332.0805 | 1 | 3054  |

Formula Calculator Element Limits

| Element | Min | Max |
|---------|-----|-----|
| C       | 3   | 100 |
| H       | 0   | 500 |
| O       | 0   | 90  |
| N       | 0   | 5   |
| S       | 0   | 0   |
| Cl      | 0   | 0   |
| Br      | 0   | 0   |
| Si      | 0   | 0   |
| F       | 0   | 0   |
| P       | 0   | 0   |

Fragmenter Voltage: 155      Collision Energy: 0      Ionization Mode: ESI

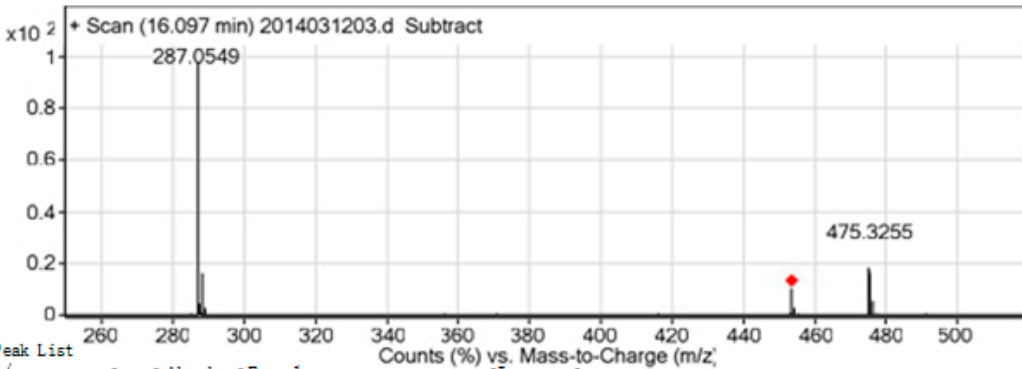

Peak List

| m/z      | z | Abund  | Formula    | Ion    |
|----------|---|--------|------------|--------|
| 287.0549 | 1 | 514308 |            |        |
| 288.0585 | 1 | 85097  |            |        |
| 453.3435 | 1 | 52063  | C23 H49 O8 | (M+H)+ |
| 475.3255 | 1 | 95391  |            |        |
| 476.3281 | 1 | 28057  |            |        |

Formula Calculator Element Limits

| Element | Min | Max |
|---------|-----|-----|
| C       | 3   | 100 |
| H       | 0   | 500 |
| O       | 0   | 90  |
| N       | 0   | 5   |
| S       | 0   | 0   |
| Cl      | 0   | 0   |
| Br      | 0   | 0   |

## Qualitative Analysis Report

| Element | Min | Max |
|---------|-----|-----|
| Si      | 0   | 0   |
| F       | 0   | 0   |
| P       | 0   | 0   |

## Formula Calculator Results

| Formula       | Best | Mass     | Tgt Mass | Diff (ppm) | Ion Species   | Score |
|---------------|------|----------|----------|------------|---------------|-------|
| C24 H44 N4 O4 |      | 452.3363 | 452.3363 | 0          | C24 H45 N4 O4 | 99.97 |
| C26 H46 N O5  |      | 452.3363 | 452.3376 | 2.98       | C26 H47 N O5  | 99.77 |
| C23 H48 O8    | TRUE | 452.3362 | 452.3349 | -2.94      | C23 H49 O8    | 99.72 |
| C21 H46 N3 O7 |      | 452.3363 | 452.3336 | -5.92      | C21 H47 N3 O7 | 99.18 |
| C27 H42 N5 O  |      | 452.3363 | 452.3389 | 5.92       | C27 H43 N5 O  | 99.07 |

Fragmenter Voltage 155 Collision Energy 30 Ionization Mode ESI

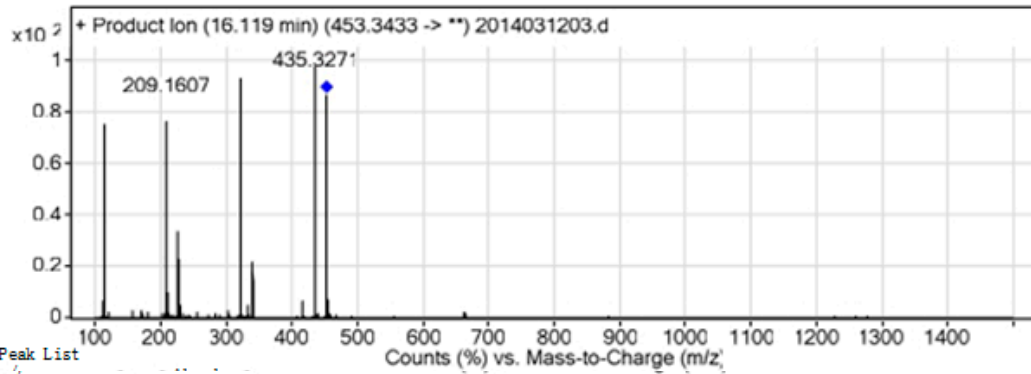

## Peak List

| m/z      | z | Abund |
|----------|---|-------|
| 114.0897 | 1 | 1483  |
| 209.1607 | 1 | 1523  |
| 226.1892 |   | 658   |
| 227.1726 |   | 274   |
| 228.1572 |   | 448   |
| 322.2457 |   | 1820  |
| 339.2755 |   | 419   |
| 340.2602 |   | 396   |
| 435.3271 | 1 | 1952  |
| 453.336  | 1 | 1691  |

## Formula Calculator Element Limits

| Element | Min | Max |
|---------|-----|-----|
| C       | 3   | 100 |
| H       | 0   | 500 |
| O       | 0   | 90  |
| N       | 0   | 5   |
| S       | 0   | 0   |
| Cl      | 0   | 0   |
| Br      | 0   | 0   |
| Si      | 0   | 0   |
| F       | 0   | 0   |
| P       | 0   | 0   |

Fragmenter Voltage 155 Collision Energy 0 Ionization Mode ESI



Qualitative Analysis Report

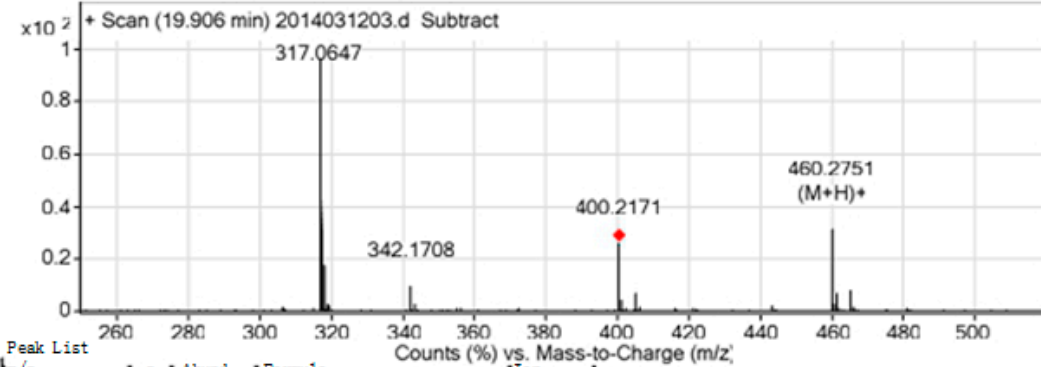

Peak List

| m/z      | z | Abund  | Formula       | Ion    |
|----------|---|--------|---------------|--------|
| 121.0455 |   | 18530  |               |        |
| 317.0647 | 1 | 119037 |               |        |
| 318.0686 | 1 | 20786  |               |        |
| 342.1708 |   | 11609  |               |        |
| 400.2171 |   | 31282  |               |        |
| 405.1738 |   | 8450   |               |        |
| 460.2751 | 1 | 37780  | C19 H42 N O11 | (M+H)+ |
| 461.2791 | 1 | 8425   | C19 H42 N O11 | (M+H)+ |
| 465.2301 |   | 9919   |               |        |

Formula Calculator Element Limits

| Element | Min | Max |
|---------|-----|-----|
| C       | 3   | 100 |
| H       | 0   | 500 |
| O       | 0   | 90  |
| N       | 0   | 5   |
| S       | 0   | 0   |
| Cl      | 0   | 0   |
| Br      | 0   | 0   |
| Si      | 0   | 0   |
| F       | 0   | 0   |
| P       | 0   | 0   |

Formula Calculator Results

| Formula        | Best | Mass     | Tgt. Mass | Diff (ppm) | Ion Species    | Score |
|----------------|------|----------|-----------|------------|----------------|-------|
| C19 H41 N O11  | TRUE | 459.2678 | 459.268   | 0.37       | C19 H42 N O11  | 99.95 |
| C17 H39 N4 O10 |      | 459.2678 | 459.2666  | -2.56      | C17 H40 N4 O10 | 99.77 |
| C20 H37 N5 O7  |      | 459.2678 | 459.2693  | 3.27       | C20 H38 N5 O7  | 99.67 |
| C32 H33 N3     |      | 459.2678 | 459.2674  | -0.75      | C32 H34 N3     | 95.91 |
| C34 H35 O      |      | 459.2678 | 459.2688  | 2.18       | C34 H36 O      | 95.37 |

Fragmenter Voltage: 155  
 Collision Energy: 30  
 Ionization Mode: ESI

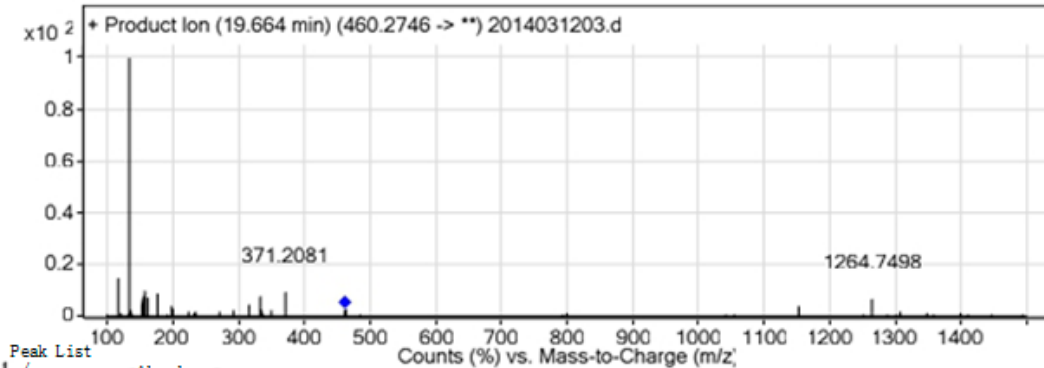

Peak List

| m/z       | Abund |
|-----------|-------|
| 371.2081  |       |
| 1264.7498 |       |

Qualitative Analysis Report

|           |     |
|-----------|-----|
| 117.0883  | 96  |
| 133.087   | 654 |
| 153.9169  | 50  |
| 156.8868  | 64  |
| 161.0778  | 48  |
| 177.1082  | 58  |
| 333.8117  | 48  |
| 371.2081  | 62  |
| 1264.7498 | 43  |

Formula Calculator Element Limits

| Element | Min | Max |
|---------|-----|-----|
| C       | 3   | 100 |
| H       | 0   | 500 |
| O       | 0   | 90  |
| N       | 0   | 5   |
| S       | 0   | 0   |
| Cl      | 0   | 0   |
| Br      | 0   | 0   |
| Si      | 0   | 0   |
| F       | 0   | 0   |
| P       | 0   | 0   |

Fragmenter Voltage 155 Collision Energy 0 Ionization Mode Est

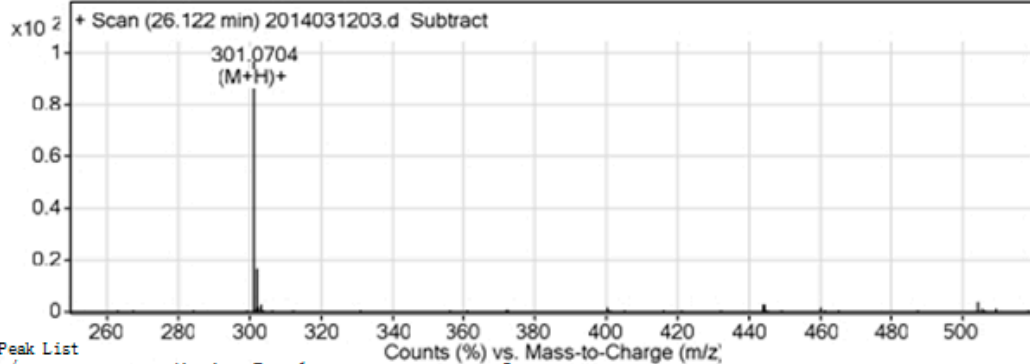

| m/z      | z | Abund  | Formula    | Ion    |
|----------|---|--------|------------|--------|
| 301.0704 | 1 | 405070 | C16 H13 O6 | (M+H)+ |
| 302.0737 | 1 | 69280  | C16 H13 O6 | (M+H)+ |

Formula Calculator Element Limits

| Element | Min | Max |
|---------|-----|-----|
| C       | 3   | 100 |
| H       | 0   | 500 |
| O       | 0   | 90  |
| N       | 0   | 5   |
| S       | 0   | 0   |
| Cl      | 0   | 0   |
| Br      | 0   | 0   |
| Si      | 0   | 0   |
| F       | 0   | 0   |
| P       | 0   | 0   |

Formula Calculator Results

| Formula       | Best | Mass     | Tgt. Mass | Diff (ppm) | Ion Species   | Score |
|---------------|------|----------|-----------|------------|---------------|-------|
| C16 H12 O6    | TRUE | 300.0632 | 300.0634  | 0.77       | C16 H13 O6    | 99.97 |
| C14 H10 N3 O5 |      | 300.0632 | 300.062   | -3.72      | C14 H11 N3 O5 | 99.77 |
| C17 H8 N4 O2  |      | 300.0632 | 300.0647  | 5.21       | C17 H9 N4 O2  | 99.29 |

Fragmenter Voltage 155 Collision Energy 30 Ionization Mode Est

Qualitative Analysis Report

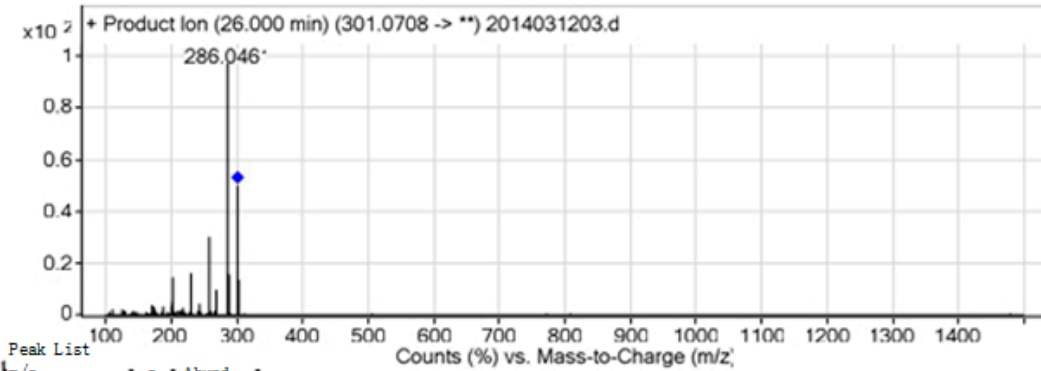

Peak List

| m/z      | z | Abund |
|----------|---|-------|
| 202.0596 |   | 718   |
| 229.045  |   | 648   |
| 230.0538 |   | 810   |
| 257.0402 |   | 736   |
| 258.0497 |   | 1476  |
| 268.0354 |   | 473   |
| 286.0461 | 1 | 4900  |
| 287.0444 | 1 | 760   |
| 301.0678 | 1 | 2484  |
| 302.0696 | 1 | 666   |

Formula Calculator Element Limits

| Element | Min | Max |
|---------|-----|-----|
| C       | 3   | 100 |
| H       | 0   | 500 |
| O       | 0   | 90  |
| N       | 0   | 5   |
| S       | 0   | 0   |
| Cl      | 0   | 0   |
| Br      | 0   | 0   |
| Si      | 0   | 0   |
| F       | 0   | 0   |
| P       | 0   | 0   |

Fragmenter Voltage: 155  
 Collision Energy: 0  
 Ionization Mode: ESI

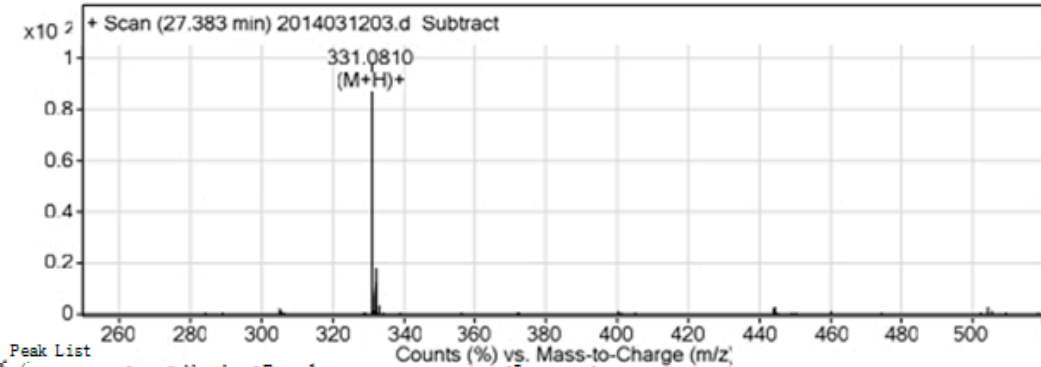

Peak List

| m/z      | z | Abund  | Formula    | Ion    |
|----------|---|--------|------------|--------|
| 331.081  | 1 | 491513 | C17 H15 O7 | (M+H)+ |
| 332.0839 | 1 | 88997  | C17 H15 O7 | (M+H)+ |

Formula Calculator Element Limits

| Element | Min | Max |
|---------|-----|-----|
| C       | 3   | 100 |
| H       | 0   | 500 |

## Qualitative Analysis Report

|    |   |    |
|----|---|----|
| O  | 0 | 90 |
| N  | 0 | 5  |
| S  | 0 | 0  |
| Cl | 0 | 0  |
| Br | 0 | 0  |
| Si | 0 | 0  |
| F  | 0 | 0  |
| P  | 0 | 0  |

## Formula Calculator Results

| Formula       | Best | Mass     | Tgt Mass | Diff (ppm) | Ion Species   | Score |
|---------------|------|----------|----------|------------|---------------|-------|
| C17 H14 O7    | TRUE | 330.0737 | 330.074  | 0.63       | C17 H15 O7    | 99.96 |
| C15 H12 N3 O6 |      | 330.0737 | 330.0726 | -3.45      | C15 H13 N3 O6 | 99.8  |
| C18 H10 N4 O3 |      | 330.0737 | 330.0753 | 4.67       | C18 H11 N4 O3 | 99.35 |

Fragmentor Voltage 155      Collision Energy 30      Ionization Mode ESI

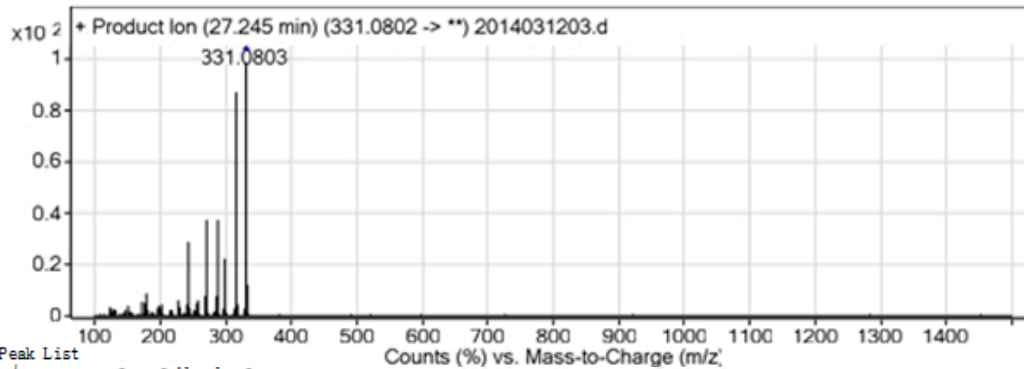

| Peak List | m/z      | z | Abund |
|-----------|----------|---|-------|
|           | 178.022  |   | 228   |
|           | 242.0547 |   | 732   |
|           | 270.0525 |   | 954   |
|           | 287.0557 |   | 971   |
|           | 298.0431 |   | 572   |
|           | 299.0503 |   | 433   |
|           | 315.0479 | 1 | 2268  |
|           | 316.051  | 1 | 586   |
|           | 331.0803 | 1 | 2550  |
|           | 332.0863 | 1 | 304   |

## Formula Calculator Element Limits

| Element | Min | Max |
|---------|-----|-----|
| C       | 3   | 100 |
| H       | 0   | 500 |
| O       | 0   | 90  |
| N       | 0   | 5   |
| S       | 0   | 0   |
| Cl      | 0   | 0   |
| Br      | 0   | 0   |
| Si      | 0   | 0   |
| F       | 0   | 0   |
| P       | 0   | 0   |

--- End Of Report ---
